# Supplementary material for: 3D Flower-like Tin Monosulfide/Carbon Nanocomposite Anodes for Sodium-Ion Batteries
Source: MDPI journal article supplement (doi:10.3390/nano12081351), 2022-04-14
Supplement: s1 [file s1]

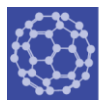

## 3D Flower-like Tin Monosulfide/Carbon Nanocomposite Anodes for Sodium-Ion Batteries

Changju Chae <sup>1</sup> and Sunho Jeong <sup>2,\*</sup>

<sup>1</sup> Division of Advanced Materials, Korea Research Institute of Chemical Technology (KRICT), Daejeon 34114, Korea; changju@kRICT.re.kr

<sup>2</sup> Department of Advanced Materials Engineering for Information and Electronics, Integrated Education Institute for Frontier Science & Technology (BK21 Four), Kyung Hee University, Yongin-si, 17104, Korea

\* Correspondence: sjeong@khu.ac.kr

**Table S1.** The values in coulombic efficiency for the cell employing RGO/F-SnS NCs active materials.

| Cycle # | Coulombic Efficiency |
|---------|----------------------|
| 1st     | 32.1%                |
| 2nd     | 101.5%               |
| 3rd     | 94.1%                |
| 4th     | 94.9%                |
| 5th     | 95.5%                |
| 6th     | 95.9%                |
| 7th     | 96.0%                |

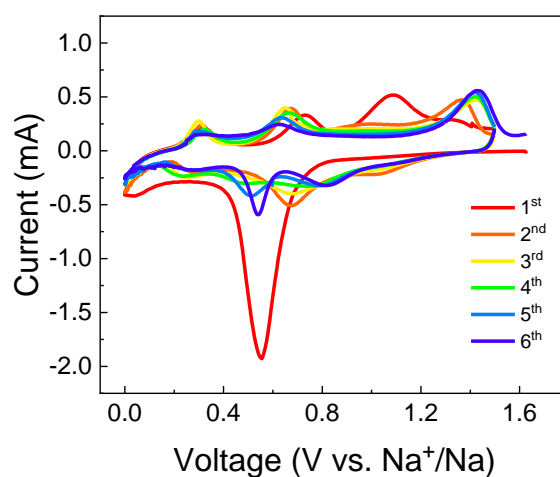

**Figure S1.** Cyclic voltammetry data for the cell employing the F-SnS NPs active materials.

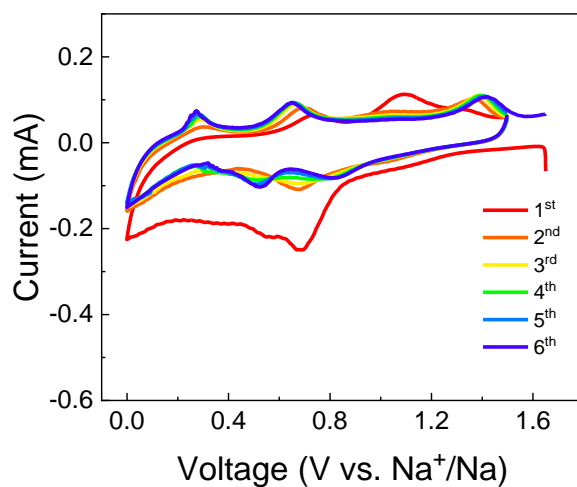

**Figure S2.** Cyclic voltammetry data for the cell employing the RGO/F-SnS NCs active materials.

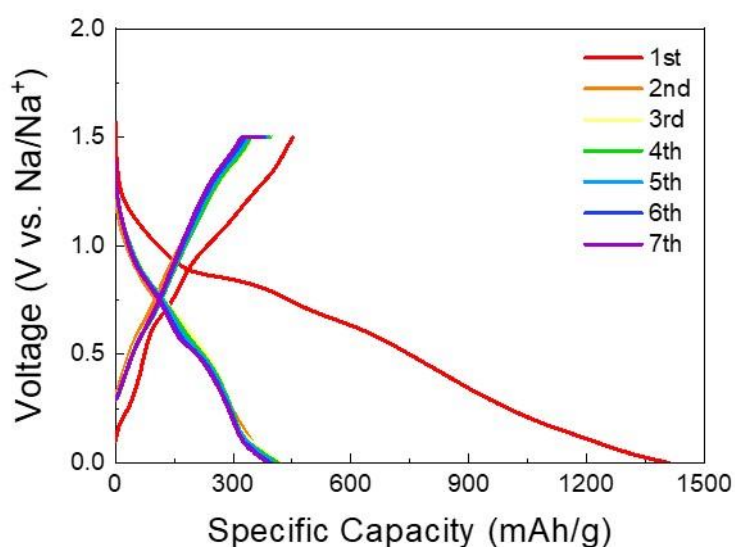

**Figure S3.** Voltage profiles for the cell employing the RGO/F-SnS NCs active materials. The current density was 200 mA/g.

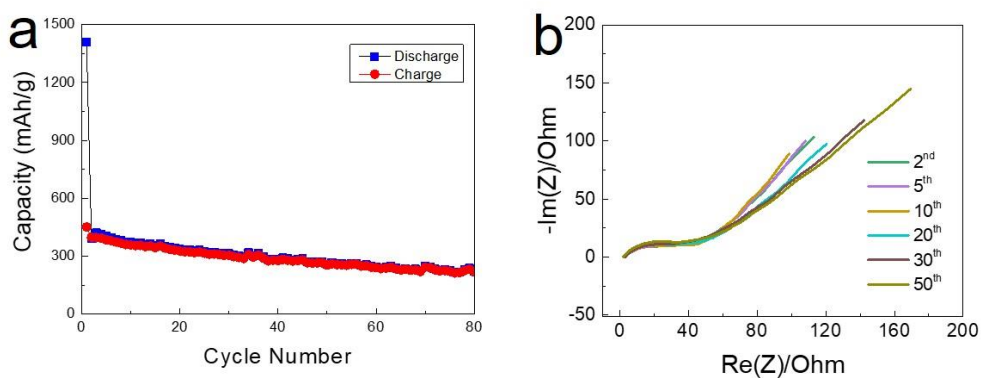

**Figure S4.** (a) Cyclability and (b) electrochemical impedance spectroscopy data during long-term cycling test for the cell employing the RGO/F-SnS NCs active materials. The current density was 200 mA/g.
